# Supplementary material
Source: Springer Nature journal article supplement (https://www.springermedizin.de/resource/supplementary/13054_2012_607_MOESM3_ESM.pdf/9708850)

**A:**

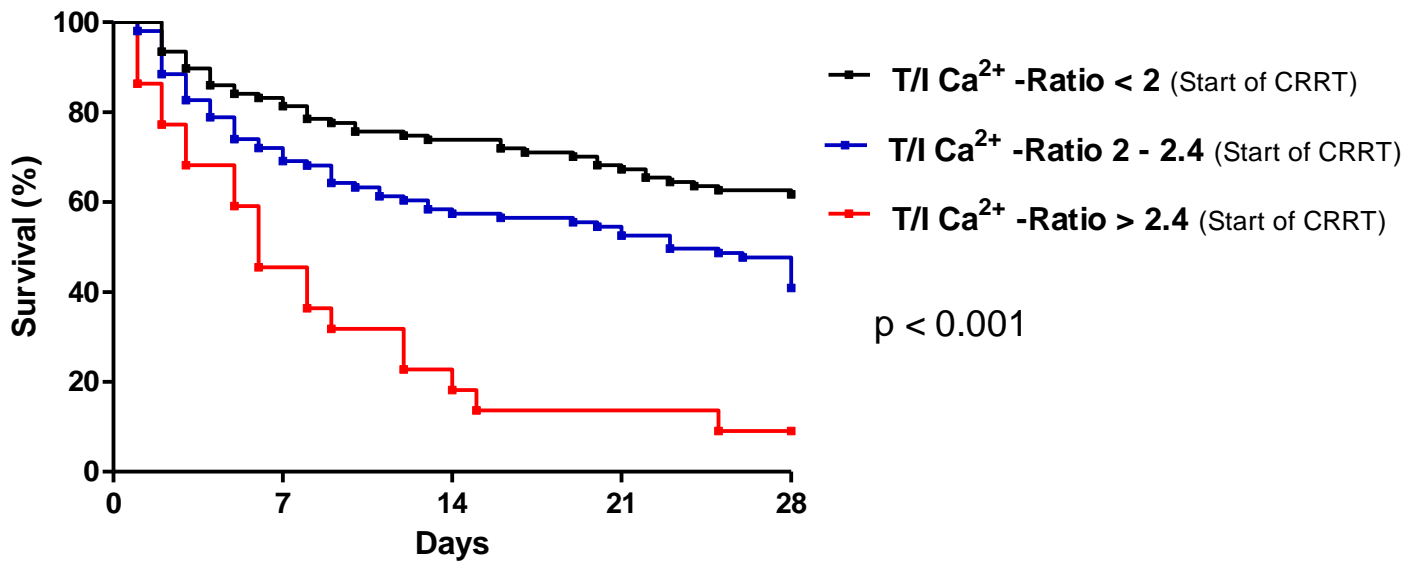

**B:**

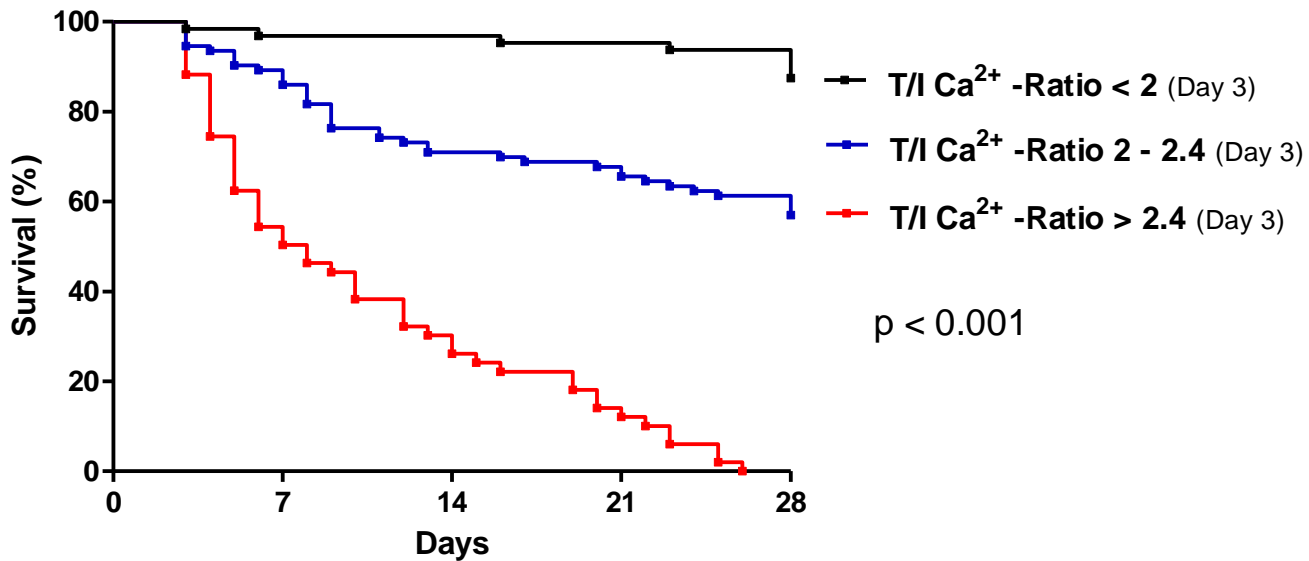

Supplement: MOESM3 [file 9708850]
